# Supplementary material for: Synthesis and application of Bi2WO6for the photocatalytic degradation of two typical fluoroquinolones under visible light irradiation
Source: Royal Society of Chemistry journal article supplement (doi:10.1039/c9ra04445k), 2019-01-01
Supplement: c9ra04445k1.pdf [file c9ra04445k1.pdf]

## ***Supplementary Materials***

### **Synthesis and application of Bi<sub>2</sub>WO<sub>6</sub> for the photocatalytic degradation of two typical fluoroquinolones under visible light irradiation**

Cong Huang<sup>a,b, 1</sup>, Leilei Chen<sup>a,b, 1</sup>, Haipu Li<sup>a,b,\*</sup>, Yanguang Mu<sup>a,b</sup>, Zhaoguang Yang<sup>a,b,\*</sup>

<sup>a</sup> *Center for Environment and Water Resources, College of Chemistry and Chemical Engineering, Central South University, Changsha 410083, PR China*

<sup>b</sup> *Key Laboratory of Hunan Province for Water Environment and Agriculture Product Safety, Changsha 410083, PR China*

\* Corresponding author.

E-mail addresses: [lihaipu@csu.edu.cn](mailto:lihaipu@csu.edu.cn) (Haipu Li), [zgyang@csu.edu.cn](mailto:zgyang@csu.edu.cn) (Zhaoguang Yang)

<sup>1</sup> Cong Huang and Leilei Chen contributed equally to this work.

---

## Figure captions

**Fig. S1** (a) Ultraviolet absorption spectrum and (b) Working curve of 0.1-10 mg/L NOR.

**Fig. S2** (a) Ultraviolet absorption spectrum and (b) Working curve of 0.1-10 mg/L ENR.

**Fig. S3** TEM image of 450-Bi<sub>2</sub>WO<sub>6</sub> sample.

**Fig. S4** Adsorption of NOR and ENR on the different prepared Bi<sub>2</sub>WO<sub>6</sub> samples.

**Fig. S5** Kinetics of effects of the operation parameters on the degradation. Amount of 450-Bi<sub>2</sub>WO<sub>6</sub> for degradation of (a) NOR and (b) ENR with 10 mg/L initial concentration at initial pH; initial concentrations of (c) NOR and (d) ENR with 0.5 g/L catalyst at initial pH; pH values in degradation of (e) NOR and (f) ENR with 0.5 g/L catalyst and 10 mg/L initial concentration.

**Fig. S6** Variations of TOC of NOR and ENR aqueous solutions with irradiation time under the optimal degradation conditions

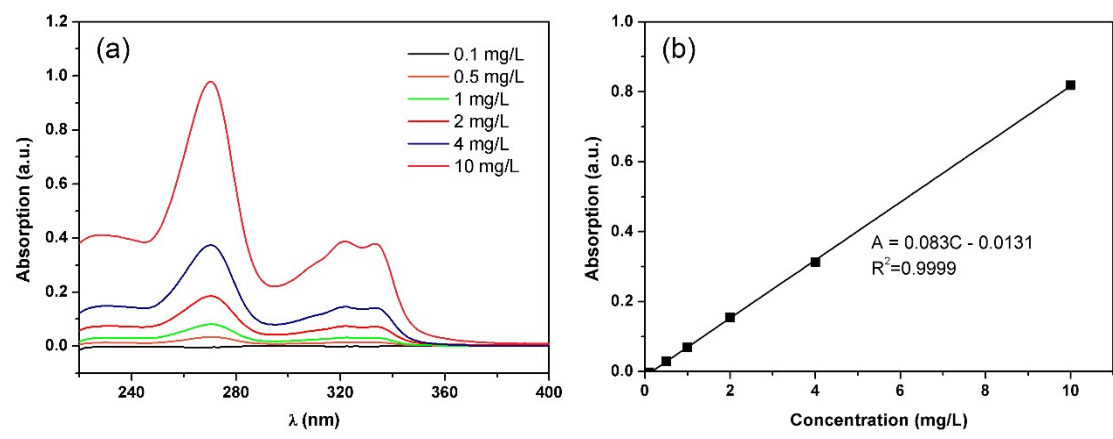

Fig. S1 (a) Ultraviolet absorption spectrum and (b) Working curve of 0.1-10 mg/L NOR

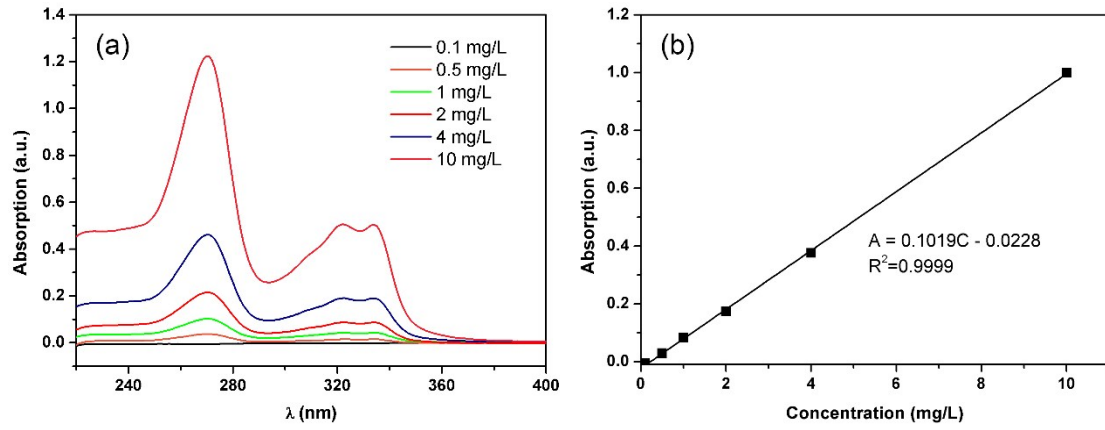

Fig. S2 (a) Ultraviolet absorption spectrum and (b) Working curve of 0.1-10 mg/L ENR

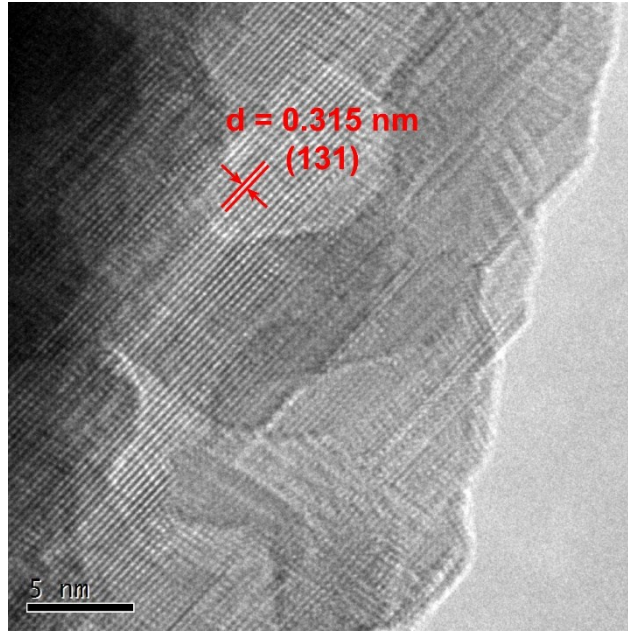

Fig. S3 TEM image of 450-Bi<sub>2</sub>WO<sub>6</sub> sample.

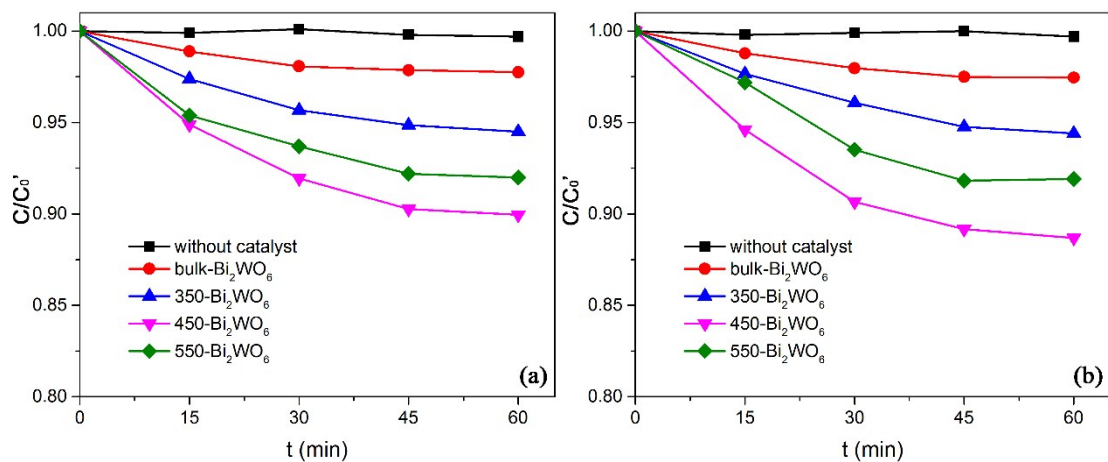

Fig. S4 Adsorption of NOR (a) and ENR (b) on the different prepared Bi<sub>2</sub>WO<sub>6</sub> samples (10 mg/L drug solution, 0.5 g/L photocatalyst, initial pH of 10.2 for NOR and of 10.7 for ENR).

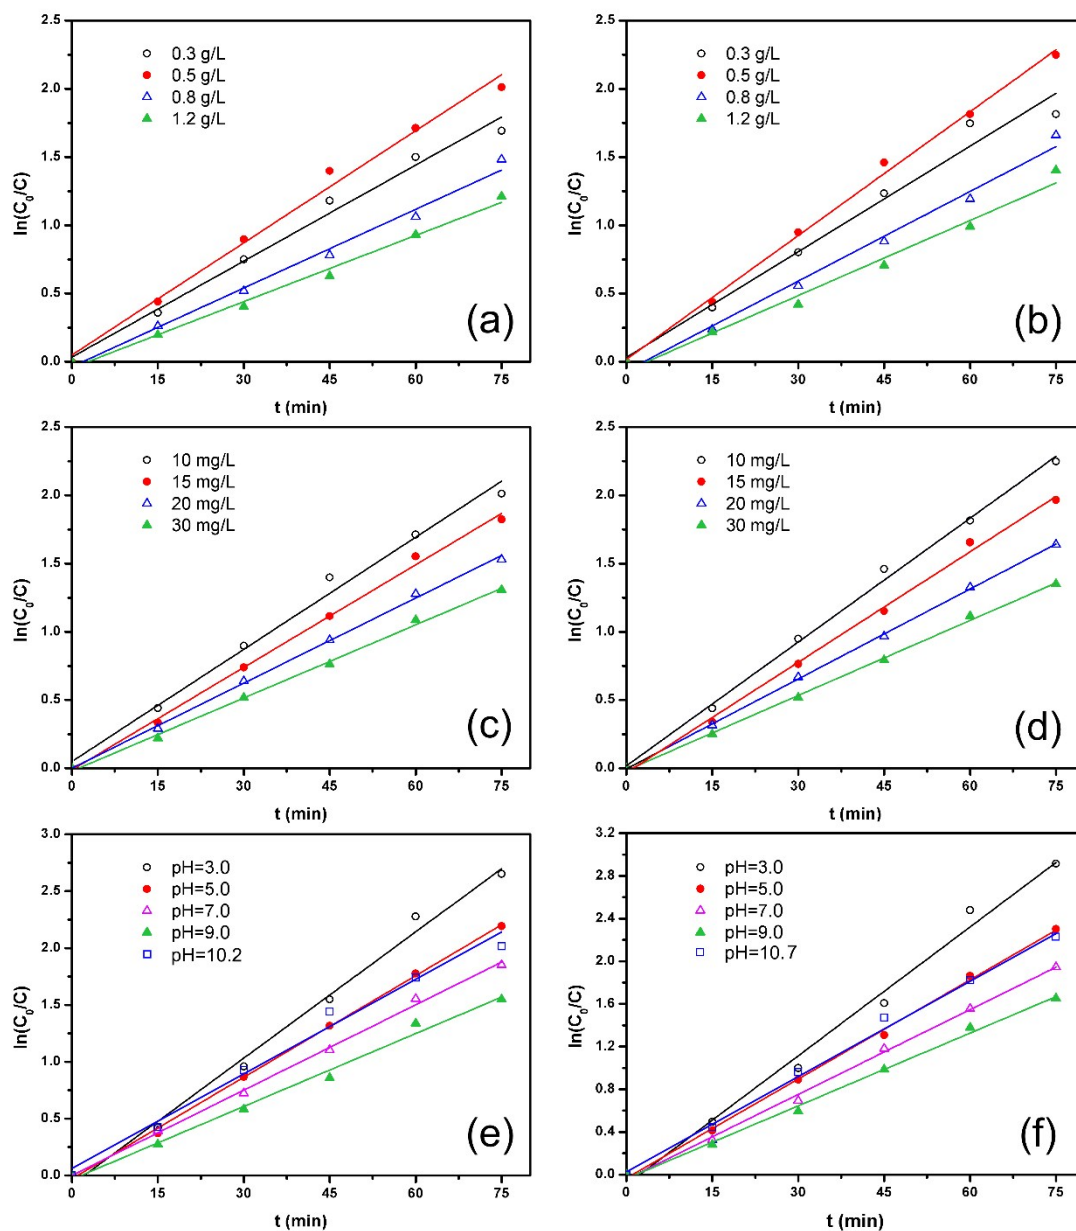

Fig. S5 Kinetics of effects of the operation parameters on the degradation of NOR or ENR (Different amounts of  $450\text{-Bi}_2\text{WO}_6$  for the solutions with the initial concentration of  $10\text{ mg/L}$  initial pH; solutions with different initial concentrations at  $450\text{-Bi}_2\text{WO}_6$  dosage of  $0.5\text{ g/L}$  and initial pH; solutions with the initial concentration of  $10\text{ mg/L}$  at  $450\text{-Bi}_2\text{WO}_6$  dosage of  $0.5\text{ g/L}$  and different initial pH).

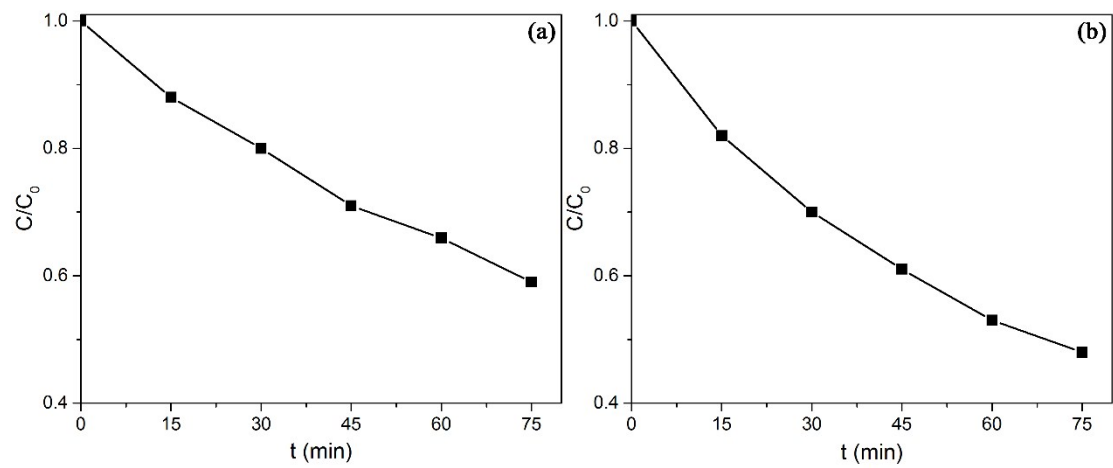

Fig. S6 Variations of TOC of NOR (a) and ENR (b) aqueous solutions with irradiation time under the optimal degradation conditions (10 mg/L NOR and ENR aqueous solutions at initial pH of 3 with 0.5 g/L 450-Bi<sub>2</sub>WO<sub>6</sub>).
